# Supplementary material for: Effect of Different Drying Treatments and Sieving on Royal Gala Apple Pomace, a Thickening Agent with Antioxidant Properties
Source: MDPI journal article supplement (doi:10.3390/plants12040906), 2023-02-16
Supplement: s1 [file s1]

## Article

# Investigation on apple pomace as thickening agent with antioxidant properties

Lina Cossignani<sup>1,†</sup>, Federica Ianni<sup>1,†</sup>, Francesca Blasi<sup>1,\*</sup>, Luna Pollini<sup>1</sup>, Alessandro Di Michele<sup>2</sup>, Cinzia Pagano<sup>3,\*</sup>, Maurizio Ricci<sup>3</sup>, Luana Peroli<sup>3</sup>

<sup>1</sup> Section of Food Sciences and Nutrition, Department of Pharmaceutical Sciences, University of Perugia, 06126 Perugia, Italy

<sup>2</sup> Department of Physics and Geology, University of Perugia, 06123, Perugia, Italy

<sup>3</sup> Section of Pharmaceutical Chemistry and Technology, Department of Pharmaceutical Sciences, University of Perugia, 06123 Perugia, Italy

\* Correspondence: francesca.blasi@unipg.it (F.B.); cinzia.pagano@unipg.it (C.P.)

Tel.: +39-075-585-7954 (F.B.); +39-075-585-5158 (C.P.)

† These authors contributed equally to this work.

**Table S1.** Correlation analysis (coefficient of determination,  $R^2$ ) between the spectrophotometric parameters (TPC, DPPH, ABTS, and FRAP), taking into consideration AP samples with each PS (> 400  $\mu\text{m}$ ; 250–400  $\mu\text{m}$ ; < 250  $\mu\text{m}$ ).

| PS                    | TPC    | DPPH   | ABTS   | FRAP |
|-----------------------|--------|--------|--------|------|
| > 400 $\mu\text{m}$   |        |        |        |      |
| TPC                   | -      |        |        |      |
| DPPH                  | 0.9969 | -      |        |      |
| ABTS                  | 0.9999 | 0.9971 | -      |      |
| FRAP                  | 0.9891 | 0.9744 | 0.9886 | -    |
| 250–400 $\mu\text{m}$ |        |        |        |      |
| TPC                   | -      |        |        |      |
| DPPH                  | 0.9772 | -      |        |      |
| ABTS                  | 0.9994 | 0.9690 | -      |      |
| FRAP                  | 0.9902 | 0.9972 | 0.9846 | -    |
| < 250 $\mu\text{m}$   |        |        |        |      |
| TPC                   | -      |        |        |      |
| DPPH                  | 0.9995 | -      |        |      |
| ABTS                  | 0.9678 | 0.9594 | -      |      |
| FRAP                  | 0.0350 | 0.0272 | 0.1298 | -    |

PS, particle size; TPC, total phenol content measured by spectrophotometric assay; DPPH, 2,2-diphenyl-1-picrylhydrazyl; ABTS, 2,2'-azino-bis(3-ethylbenzothiazoline-6-sulfonic acid) diammonium salt; FRAP, ferric reducing antioxidant power.

**Table S2.** Correlation analysis (coefficient of determination,  $R^2$ ) between HPLC data (individual phenol content and TPC-HPLC) and spectrophotometric results (TPC, DPPH, ABTS, FRAP), taking into consideration AP samples with each particle size ( $> 400 \mu\text{m}$ ;  $250\text{-}400 \mu\text{m}$ ;  $< 250 \mu\text{m}$ ).

| PS                                       | TPC    | DPPH   | ABTS   | FRAP   |
|------------------------------------------|--------|--------|--------|--------|
| $> 400 \mu\text{m}$                      |        |        |        |        |
| chlorogenic acid                         | 0.0708 | 0.0708 | 0.0720 | 0.0268 |
| quercetin-3- <i>O</i> -galactoside       | 0.9244 | 0.8922 | 0.9231 | 0.9701 |
| quercetin-3- <i>O</i> -glucoside         | 0.9169 | 0.8834 | 0.9156 | 0.9652 |
| quercetin-3- <i>O</i> -xyloside          | 0.9294 | 0.8981 | 0.9281 | 0.9732 |
| quercetin-3- <i>O</i> -arabinofuranoside | 0.9377 | 0.9079 | 0.9365 | 0.9784 |
| quercetin-3- <i>O</i> -rhamnoside        | 0.9474 | 0.9197 | 0.9463 | 0.9840 |
| phloridzin                               | 0.9999 | 0.8657 | 0.8271 | 0.7393 |
| TPC-HPLC                                 | 0.9472 | 0.9194 | 0.9461 | 0.9839 |
| $250\text{-}400 \mu\text{m}$             |        |        |        |        |
| chlorogenic acid                         | 0.9936 | 0.9948 | 0.9890 | 0.9996 |
| quercetin-3- <i>O</i> -galactoside       | 0.9999 | 0.9760 | 0.9995 | 0.9895 |
| quercetin-3- <i>O</i> -glucoside         | 0.9257 | 0.9846 | 0.9119 | 0.9690 |
| quercetin-3- <i>O</i> -xyloside          | 0.9772 | 0.9999 | 0.9999 | 0.9972 |
| quercetin-3- <i>O</i> -arabinofuranoside | 0.9992 | 0.9850 | 0.9850 | 0.9951 |
| quercetin-3- <i>O</i> -rhamnoside        | 0.9671 | 0.9991 | 0.9991 | 0.9931 |
| phloridzin                               | 0.9997 | 0.9820 | 0.9820 | 0.9933 |
| TPC-HPLC                                 | 0.9951 | 0.9934 | 0.9909 | 0.9992 |
| $< 250 \mu\text{m}$                      |        |        |        |        |
| chlorogenic acid                         | 0.9998 | 0.9986 | 0.9727 | 0.0405 |
| quercetin-3- <i>O</i> -galactoside       | 0.9990 | 0.9990 | 0.9711 | 0.0386 |
| quercetin-3- <i>O</i> -glucoside         | 0.8881 | 0.8951 | 0.7422 | 0.0267 |
| quercetin-3- <i>O</i> -xyloside          | 0.8921 | 0.9056 | 0.9056 | 0.0213 |
| quercetin-3- <i>O</i> -arabinofuranoside | 0.9978 | 0.9994 | 0.9491 | 0.0198 |
| quercetin-3- <i>O</i> -rhamnoside        | 0.8109 | 0.8281 | 0.6526 | 0.0670 |
| phloridzin                               | 0.9999 | 0.9991 | 0.9702 | 0.0376 |
| TPC-HPLC                                 | 0.9924 | 0.9958 | 0.9301 | 0.0102 |
